# Supplementary material for: Public Concerns and Liability Perspectives in the Shipowner's Country: Insights from the Oil Spill Incident Involving a Japanese-owned Carrier Near Mauritius
Source: Research Square preprint supplement (doi:10.21203/rs.3.rs-6720728/v1), 2025-06-03
Supplement: Supplementary file 1 [file 4a64669c38161566153e645b.docx]

**Appendix S1. Conversion from balanced incomplete block design to choose sets**

NOTE: “A” appears in three choice sets on the left side (the first, third, and fourth choice sets). In these three choice sets, “A” is compared two times each against each of the other goals (i.e., “B”, “C”, “D”, and “E”).

|  | | BIBD | | | |  |  | | Choice sets | | | |
| --- | --- | --- | --- | --- | --- | --- | --- | --- | --- | --- | --- | --- |
| 1 | **A** | | B | C | D |  | 1 | **Fishery** | | Mangrove | Health | Coral reef |
| 2 | B | | C | E | D | ⇒ | 2 | Mangrove | | Health | Tourism | Coral reef |
| 3 | **A** | | B | D | E | 3 | **Fishery** | | Mangrove | Coral reef | Tourism |
| 4 | C | | D | E | **A** |  | 4 | Health | | Coral reef | Tourism | **Fishery** |
| 5 | E | | C | **A** | B |  | 5 | Tourism | | Health | **Fishery** | Mangrove |
